# **Genomic investigation reveals contaminated detergent as the source of an ESBL-producing *Klebsiella michiganensis* outbreak in a neonatal unit**

## **Authors:**

Paul Chapman<sup>1,2#</sup>, Brian M. Forde<sup>3#</sup>, Leah W. Roberts<sup>3</sup>, Haakon Bergh<sup>4</sup>, Debra Vesey<sup>1</sup>, Amy V. Jennison<sup>5</sup>, Susan Moss<sup>5,6</sup>, David L. Paterson<sup>4,6</sup> Scott A. Beatson<sup>3</sup>, Patrick N. A. Harris<sup>4,6\*</sup>

## **Affiliations:**

1. Infection Prevention and Control, Caboolture Hospital, QLD, Australia
2. QIMR Berghofer, Herston, QLD, Australia
3. School of Chemistry and Molecular Biosciences, The University of Queensland, Brisbane, QLD, Australia
4. Central Microbiology, Pathology Queensland, Royal Brisbane & Women's Hospital, QLD, Australia
5. Public Health Microbiology, Forensic and Scientific Services, Queensland Health, Brisbane, QLD, Australia
6. University of Queensland, Faculty of Medicine, UQ Centre for Clinical Research, Royal Brisbane & Women's Hospital, QLD, Australia

**# Paul Chapman and Brian M. Forde contributed equally to this work**

## **\*Corresponding author:**

Dr. Patrick N. A. Harris

University of Queensland Centre for Clinical Research

Building 71/918 Royal Brisbane & Women's Hospital Campus, Herston, QLD, 4029

Email: p.harris@uq.edu.au

Tel: +61 (0) 7 3346 6081

**Running title:** ESBL-*K. michiganensis* neonatal outbreak

**Word count:** 2,928

**Key words:** *Klebsiella oxytoca*, *Klebsiella michiganensis*, whole genome sequencing, extended-spectrum  $\beta$ -lactamase, outbreak

**Key points:**

- *K. michiganensis* can be misidentified as *K. oxytoca* and is probably under-recognized as a nosocomial pathogen
- Whole genome sequencing of neonatal and environmental isolates during an outbreak of ESBL-producing *K. michiganensis* confirmed contaminated detergent and sinks to be the source

## **Abstract**

**Background:** *Klebsiella* species are problematic pathogens in neonatal units and may cause outbreaks, for which sources of transmission can be challenging to elucidate. We describe the use of whole genome sequencing (WGS) to investigate environmental sources of transmission during an outbreak of extended-spectrum- $\beta$ -lactamase (ESBL)-producing *Klebsiella michiganensis* colonizing neonates.

**Methods:** Ceftriaxone-resistant *Klebsiella* spp. and *Escherichia coli* isolated from neonates (or their mothers) and the hospital environment were included. Short-read (Illumina) and long-read (MinION, Oxford Nanopore Technologies) sequencing was used to confirm species taxonomy, define antimicrobial resistance genes and determine phylogenetic relationships using single nucleotide polymorphism (SNP) profiling.

**Results:** A total of 27 organisms (16 patient-derived and 11 environmental isolates) were sequenced. Standard laboratory methods identified the outbreak strain as an ESBL-producing *Klebsiella oxytoca*, but taxonomic assignment from WGS data suggested closer identity to *Klebsiella michiganensis*. Strains isolated from baby bath drains and multiple detergent dispensing bottles were either identical or closely related by SNP comparison. Detergent bottles contaminated by *K. michiganensis* had been used for washing milk-expressing equipment. No new cases were identified once the detergent bottles were removed and the baby baths decommissioned. The investigation further revealed unrecognized environmental reservoirs of ST131 ESBL-producing *E. coli* that were closely related to neonatal strains (diverging by <30 SNPs).

**Conclusions:** Environmental reservoirs may be an important source in outbreaks of multi-drug resistant organisms. WGS, in conjunction with traditional epidemiological

investigation, can be instrumental in revealing routes of transmission and guiding infection control responses.

(238 words)

## **Introduction**

Outbreaks of ESBL-producing Enterobacteriaceae within neonatal intensive care units are most commonly caused by *Klebsiella* species and may be associated with significant morbidity and mortality [1]. *Klebsiella michiganensis* was first identified from a toothbrush holder in a home in Michigan and was initially identified as *Klebsiella oxytoca*, to which it is closely related (99% nucleotide sequence identity in the 16S rRNA gene sequence) [2]. Since characterization, *K. michiganensis* has been reported in clinical settings, including as a cause of diarrhea in a hematopoietic stem cell transplant recipient [3], from a sample of fluid from an abdominal fistula [4], and in an investigation of hospital-acquired colonization by a New Delhi metallo- $\beta$ -lactamase-producing organism [5]. While *K. oxytoca*'s role in nosocomial outbreaks is established [6-9], there have been no reported outbreaks involving *K. michiganensis* to date.

Similar to *K. oxytoca*, *K. michiganensis* carries a chromosomally-encoded OXY-type (Ambler class A)  $\beta$ -lactamase [10, 11] (also labelled as K1 in *K. oxytoca* the [12]) which mediates resistance to amino- and carboxy-penicillins (e.g. ampicillin, ticarcillin, temocillin). Over-expression of OXY enzymes arising from mutations in regulatory genes [13-15] can lead to phenotypic resistance to multiple  $\beta$ -lactams. Constitutive hyperproducers may also be selected during antibiotic therapy. [16] OXY-type enzymes may give a false-positive result on extended-spectrum  $\beta$ -lactamase (ESBL) confirmation testing by the clavulanate combination disk method [17], yet are not 'classical' ESBLs (i.e. Bush-Jacoby Group 2be enzymes [18]).

Outbreaks of multi-drug resistant (MDR) organisms in neonatal units are of significant concern as empirical antibiotic strategies defined in most guidelines may have limited efficacy against MDR gram-negative bacilli. Hospitalized newborns, especially when premature, are at risk for infection caused by *Klebsiella* spp. [19], which account for a

significant proportion of nosocomially-acquired neonatal infections, particularly in developing countries.[20]

We describe an outbreak of ESBL-producing *K. michiganensis* (initially misidentified as *K. oxytoca*) occurring within a neonatal unit, declared after three apparently unrelated colonized cases were identified. The admissions did not overlap in time and preliminary examination failed to reveal any likely cross contamination events. We explored the utility of whole genome sequencing (WGS) in conjunction with a standard outbreak investigation to help resolve the source of the outbreak and guide interventions that successfully halted transmission.

## **Material and methods**

### **Setting**

The outbreak investigation was undertaken in a 280 bed regional hospital in South East Queensland, Australia. The Special Care Nursery (SCN) provides care for neonates greater than 32 weeks gestation or a birth weight of  $\geq 1500\text{g}$ . The unit is designed to accommodate 12 to 14 neonates. Active surveillance (rectal swabs) for multi-resistant organisms (MROs) including methicillin resistant *Staphylococcus aureus* (MRSA), multi-resistant Gram-negative (MRGN) bacteria and vancomycin resistant *Enterococcus* (VRE) is performed weekly and on all transfers in to the unit. All cases of MRO colonization or infection are reviewed by the infection control (IC) team and contact isolation is employed for all MRSA, VRE and MRGN (except ESBL-producing *Escherichia coli*).

### **Definitions, data collection and infection control responses**

After declaration of the outbreak, enhanced surveillance was introduced with rectal swabbing of all SCN patients every 48 hours. All neonates with positive screening

swabs were isolated in single rooms (when available) and with contact precautions (as per routine policy). Mothers of colonized babies were also screened. Direct observation of IC procedures and hand hygiene performance was performed by independent Hand Hygiene Australia (HHA) accredited IC staff. SCN procedures and policy compliance were reviewed.

### **Microbial Surveillance**

Rectal swabs were collected and plated onto selective chromogenic media (chromID™ ESBL agar; bioMérieux) and examined after 18-24 hours incubation in O<sub>2</sub>. Colonies which grew on selective media were identified by matrix-associated laser desorption/ionization-time-of-flight mass spectrometry (MALDI-TOF) (Vitek MS, bioMérieux) and antibiotic susceptibility determined using the Vitek 2 system (bioMérieux). ESBL production was confirmed using combination disk diffusion, where an increase in the zone of inhibition  $\geq 5$ mm by the addition of clavulanic acid (10 µg) to Cefotaxime (30 µg) or Ceftazidime (30 µg) disks suggests ESBL production.[21] After the incident case (case 1) was identified, any ceftriaxone-resistant *K. oxytoca* from neonatal cultures of any body-site were stored, and following the declaration of an outbreak (case 3) all stored and prospective isolates were sent for WGS. For comparison, additional isolates were sequenced, including ESBL-producing *E. coli* and ceftriaxone-susceptible *K. oxytoca* from neonates, as well as any *K. oxytoca* identified from maternal samples. An outbreak case was defined as any individual with *K. oxytoca* cultured from any site which was determined to be resistant to ceftriaxone by Vitek 2 (irrespective of ESBL phenotypic confirmatory testing).

### **Environmental screening**



Swabs were collected from sinks, drains, aerators of faucets, soap dispensers, damp surfaces, high use equipment and the humidification apparatus of humidicribs; and samples of consumables such as shampoo, paraffin and ultrasound gel were collected and plated onto selective chromogenic media and processed in the same way as the patient screening samples (see Microbial surveillance methods).

### **Whole Genome Sequencing**

All *K. oxytoca* isolates (plus ESBL-producing *E. coli*), from neonates, their mothers or the environment were submitted for WGS at the Queensland Health Forensic Scientific Services (FSS) laboratory in 5 batches between January 29<sup>th</sup> 2018 and March 23<sup>rd</sup> 2018. Genomic DNA was extracted using QIAmp DNA mini kits (Qiagen, Australia) and quantified by spectrophotometry (NanoDrop; ThermoFisher) and fluorometry (Quant-iT; ThermoFisher). Paired-end DNA libraries were prepared using Nextera XT kits (Illumina; Australia) and whole genome sequencing was performed using Illumina NextSeq (150 bp paired end).

Using nanopore sequencing (MinION; Oxford Nanopore Technologies) we assembled the complete genome of strain M82255 for reference. In brief, 1.5 ug of DNA was used as input for the 1D sequencing by ligation kit (SQK-LSK108) as per manufacturer's instructions. The final library was loaded onto a FLOW-MIN106 R9.4 flow cell and run for approximately 40 hours on a MinION.

### ***In silico* multilocus sequencing typing, single nucleotide polymorphism (SNP) typing and resistance gene detection**

Sample analysis was undertaken using the custom Queensland Genomics Health Alliance (QGHA) infectious diseases genomic analysis pipeline (version: dev-0.4.0). In brief, raw Illumina sequencing data was quality trimmed using trimmomatic (version 0.36) [22]. *In silico* sequence typing (ST) was performed using SRST2 and

the *K. oxytoca* typing scheme available from PubMLST (<https://pubmlst.org/>). Single nucleotide polymorphism (SNP) profiling and determination of core genome SNPs was undertaken by aligning the trimmed Illumina sequencing reads for each sample to the complete genome of M82255 using Nsoni (version 0.132) (<https://github.com/Victorian-Bioinformatics-Consortium/nsoni>). Resistance gene profiling was performed by screening the trimmed sequence reads for each isolate against the ARG-ANNOT resistance gene database using SRST2 [23]. Only genes with a minimum of 90% nucleotide sequence identity and 90% sequence coverage were reported.

### **Phylogenetic analysis**

A list of polymorphic positions conserved in all strains was established using Nsoni nway. Polymorphic substitution sites were concatenated to produce an alignment that was used to reconstruct the phylogeny. A recombination filtered, Maximum Likelihood phylogenetic tree was estimated using Gubbins version 2.2.0 (<http://sanger-pathogens.github.io/gubbins/>) [24] for the SNP alignments under the generalized time reversible (GTR) nucleotide substitution model with gamma correction for among site rate variation (ASRV).

### **Accession numbers**

Genome data has been deposited to NCBI under Bioproject PRJNA512395. Raw Nanopore and Illumina sequence read data has been deposited to the Sequence Read Archive (accessions: SRR89420303-SRR8420330). The complete genome of M82255 has been deposited to GenBank (accessions: CP035214-CP035216)

### **Ethics**

WGS activities for pathogen surveillance and infection control are covered by the Queensland Genomics Health Alliance (QGHA) clinical demonstration project (HREC/17/QFSS/6), with approval for waiver of consent.

## **Results**

### **Species identification**

Initial species characterization, using MALDI-TOF, identified strain M82255 as *Klebsiella oxytoca*. Taxonomic assignment was confirmed *in silico* using kraken [25] by comparison of sequence read data for M82255 against the NCBI Refseq database containing ~25,000 complete bacterial, archaeal and viral genomes. However, after submission of the complete genome of M82255 to GenBank, a quality control test of the taxonomic assignment using average nucleotide identity (ANI) [26] revealed the genome of M82255 to be 98.903% identical to *K. michiganensis* (91.1% genome coverage) but only 92.455% similar to *K. oxytoca*. Further biochemical tests were performed on M82255 to identify its position within the genus *Klebsiella* (Table S1) and similar to *K. michiganensis*, as M82255 was unable to produce urease [2] confirming the results of the ANI approach. Consequently, M82255 was reclassified as *K. michiganensis*.

### **Incident cases**

From the incident case to identification of the final case 188 days later, there were ten neonates (and one mother) colonized with *K. michiganensis* (Figure 1). One neonate was simultaneously co-colonized with ESBL-producing *E. coli*. During this period there were approximately 880 births and 163 admissions to the special care nursery (SCN). There were no cases of clinical infection caused by *K. michiganensis*. The average length of stay in SCN was 15.7 (range 5-35) days and there was a mean of 7.9 (range 2-15) days from admission to SCN to acquisition of

ESBL-*K. michiganensis*. For context, ESBL-producing *E. coli* strains identified from 4 neonates were also included in the genomic analysis, to determine whether ESBL genes were shared between species. One patient neonatal sample was obtained from another hospital facility following discharge.

### **Infection Control Observation**

Direct observation of the SCN infection control (IC) procedures revealed that all staff hand hygiene (HH) performance was above the national bench-mark (80%). However, significant opportunities for cross contamination (break down in HH, leaning on equipment, failure to observe contact isolation procedures) were noted in relation to non-staff (e.g. families, friends). Additionally, incomplete compliance with microbial surveillance cultures on admission was noted at the start of the outbreak.

### **Environmental Screening**

Exhaustive screening of the SCN unit on multiple occasions failed to detect a source of environmental contamination. Environmental sampling was then extended to the maternity ward and birth suite. ESBL-producing *K. michiganensis* was identified from a baby-bath drain in a multi-purpose utility room containing laundry equipment (washing machine and laundry dryer), and a pair of baby baths (no longer used for bathing). However, an epidemiological link between the multi-purpose room in maternity and the colonized cases in SCN was not evident.

During IC unit observation it was noted that the hospital's volunteer flower service used the multi-purpose room for cleaning flower vases. The flower services equipment was then sampled and a second *K. michiganensis* environmental isolate was retrieved from a sample of the flower service's dishwashing detergent. The hospital's detergent was bought as bulk concentrate and then decanted into reusable detergent bottles for use around the hospital. Each drum of concentrate lasted

approximately one month. *K. michiganensis* was not identified in the bulk concentrate at the time of testing, however sampling of detergent from around the hospital identified *K. michiganensis* from 7 of 13 bottles.

### Whole genome sequencing

A total of 27 organisms (16 patient-derived isolates, from 14 individuals and 11 environmental isolates) were included in the genomic analysis (Table 1). This included 21 *K. michiganensis* and 6 *E. coli*.

All ESBL-producing *K. michiganensis* strains were clonally related and belonged to a novel multi-locus sequence type (ST) (Figure 2A). A single non-ESBL producing *K. oxytoca* (M8843) was unrelated to the outbreak and found to belong to the ST50 lineage. All *K. michiganensis* strains possessed chromosomal OXY-type  $\beta$ -lactamases, as well as SHV-2 ESBL (in addition to LEN and TEM-1B  $\beta$ -lactamases). Resistance genes for aminoglycosides (*aac3-IId*, *aph(3')-Ia*, *strA/B*) and sulphonamides (*sul1*) were also detected.

WGS and an in-depth epidemiological investigation were used to determine if *K. michiganensis* transmission resulted from direct patient-to-patient transfer or through contact with a common environmental reservoir. Phylogenetically, the *K. michiganensis* isolates formed two distinct clusters separated by 14 core genome SNPs (Figure 2B). Cluster 1 (SCN-C1 from this point on) was composed exclusively of environmental isolates with an overall intra-clade diversity of 0-21 SNPs. Environmental isolates from baby bath drain 1 (M8848) and isolates collected from 4 of the 8 tested detergent dispensing bottles (M82257, M82624, M82627 and M82628) were identical indicating that contamination during dispensing of the bulk detergent or the drum itself was likely responsible for introducing *K. michiganensis* into the hospital. Cluster 2 (SCN-C2) was composed of the 10 patient isolates and a

single environmental isolate M82256, and similar to SCN-C1, the overall diversity of SCN-C2 was 0-23 SNPs. Isolates from two patients (M8431 and M82629) were identical to the environmental isolate M82256, which was collected from a detergent dispensing bottle located in the SCN milk room.

*E. coli* strains belonged to ST131, carrying CTX-M-type ESBLs (*bla*<sub>CTX-M-14</sub> and *bla*<sub>CTX-M-27</sub>) formed 2 clusters within clades A (n=2) and C (n=2) of the global ST131 phylogeny (Figure S1) [27]. Both clade C strains (one environmental detergent sample [M8849] and one neonatal [M8844]) were closely related (separated by 30 SNPs relative to the ST131 *E. coli* EC958 [28]) suggesting they derived from a common source that has been established for several years. The *E. coli* ST131 clade A isolates (M8845 and M8631) were collected from the same patient (case 7; Table 1) and were very closely related (separated by 13 core genome SNPs relative to EC958) suggesting repeated recent exposure to a common source. Two additional but unrelated *E. coli* isolates, M8842 (ST517) and M8847 (ST1193) were also recovered from patients linked to the outbreak (cases 3 and 9; Table 1).

### **Outbreak Management**

All identified cases were isolated under contact precautions. After isolation of *K. michiganensis* in the multi-purpose room, it was immediately decommissioned and refurbished as a single use facility. Redundant equipment (baby-baths, laundry equipment) was removed and the flower service was temporarily ceased. Reusable detergent bottles from across the hospital were destroyed and the detergent supply switched to pre-filled single use detergent bottles.

As the contamination of the detergent bottles may have originated from contaminated concentrate, a search for similar cases of ESBL-producing *K. michiganensis* (or *K. oxytoca*) at other hospitals served by Pathology Queensland was performed using

the statewide laboratory information system, however there was no indication of unrecognized outbreaks at other facilities.

## Discussion

*Klebsiella* species are frequently implicated in outbreaks in the neonatal intensive care setting, although sources are not always evident despite extensive investigation and screening [29]. For example, outbreaks of multi-drug resistant *K. oxytoca* have been previously linked to environmental reservoirs, with sources described as varied as handwashing sinks [2, 5], wastewater drainage systems [4], water humidifiers for neonatal incubators [14] or transducers used for blood pressure monitoring [30]. Contaminated medical solutions such as heparin [31], sodium chloride [32] or insulin [7] have also been described as a source.

Nosocomial outbreaks of *K. michiganensis* have not been reported previously. However, based on the average nucleotide identity (ANI) approach [33], numerous strains previously identified as *K. oxytoca* have now been reclassified *K. michiganensis*, including a carbapenem resistant strain, E718 (GenBank accession: CP003683), isolated from the abdomen of a renal transplant patient [34]. In fact, of the seven complete *K. michiganensis* genomes on GenBank, including M82255 from the outbreak described here, all were originally classified as *K. oxytoca*. Consequently, it is possible that hospital outbreaks of *K. michiganensis* may go undetected as they are prone to misclassification.

Contaminated disinfectant has previously been recognized as a potential source of *K. oxytoca* sepsis in hospitalized infants [35]. Organism factors such as a mucoid phenotype via enhanced capsule formation may enable the bacteria to survive in this environment [35]. Additionally, it has been suggested that in *Klebsiella*, outer-membrane proteins, such as peptidoglycan-associated lipoprotein (Pal) and murein

lipoprotein (LppA), contribute to resistance against detergents through modulating the integrity and selective impermeability of the cell membrane independently of LPS and capsule [36]. A contaminated washing machine has also been implicated as a source of an ESBL-producing *K. oxytoca* outbreak in newborns [37]. Strains of *K. oxytoca* which are able to withstand active ingredients of commonly-used detergents, such as sodium dodecyl sulfate (SDS), have been described [38].

This report clearly demonstrates the effectiveness of high-throughput WGS as a tool to enhance and support established infection control outbreak responses. The high resolution available with WGS to compare outbreak strains was sufficient to rule out patient-to-patient transmission and suggested that an environmental reservoir might be the source of infection. The ensuing IC investigation successfully identified several environmental sites contaminated with *K. michiganensis*. WGS of the environmental isolates linked them, unequivocally, to patient isolates and identified a liquid detergent bottle in the milk dispensing room as the immediate source for onward transmission in the SCN. Washing detergent in the milk room was used by mothers to clean milk-expressing equipment resulting in cross-contamination between this equipment and expressed milk, which resulted in neonate colonization. Although the initial source of the contamination could not be confirmed, *K. michiganensis* isolates related to the outbreak were identified in liquid detergent dispensers located at different sites throughout the hospital. Liquid detergent dispensers are refilled from a central bulk drum of detergent concentrate. However, at the time of the outbreak the bulk concentrate was negative for *K. michiganensis*. It is possible that either a contaminated drum was introduced into the hospital, its contents dispensed and the drum disposed of prior to the outbreak or contamination occurred at some point during the dispensing process.



In addition to *K. michiganensis*, 6 ESBL-producing *E. coli* isolates were recovered from the local environment and from patients admitted to the SCN over the course of the outbreak. Although 4 of the 5 *E. coli* were clonally related (ST131) samples collected from different patients were sufficiently diverged to rule out any patient-to-patient transmission.

## **Conclusions**

Environmental reservoirs are increasingly recognized as a source of outbreaks involving MDR pathogens. We demonstrate how whole genome sequencing, in conjunction with standard epidemiological investigation, was instrumental in elucidating the source of ESBL-producing *K. michiganensis* in a neonatal unit and directing effective measures to interrupt transmission. Liquid detergent can become contaminated with pathogenic bacteria and should be considered as a potential source in such outbreaks.

## **Disclaimer**

The funders had no role in the data collection or analysis, decision to publish, or preparation of the manuscript.

## **Financial support**

This work was supported by funding from the Queensland Genomics Health Alliance. P.N.A.H is supported by a National Health and Medical Research Council (NHMRC) Early Career Fellowship (APP1157530).

**Potential conflicts of interest.** P.N.A.H has received a research grant from Shionogi, outside of the submitted work. D.L.P reports receiving grants and personal fees from Shionogi and Merck Sharp and Dohme and personal fees from Pfizer,

Achaogen, AstraZeneca, Leo Pharmaceuticals, Bayer, GlaxoSmithKline, Cubist, Venatorx, and Accelerate. The other authors have no conflicts of interest to declare.

## References

1. Stapleton PJ, Murphy M, McCallion N, Brennan M, Cunney R, Drew RJ. Outbreaks of extended spectrum beta-lactamase-producing Enterobacteriaceae in neonatal intensive care units: a systematic review. *Arch Dis Child Fetal Neonatal Ed* **2016**; 101(1): F72-8.
2. Saha R, Farrance CE, Verghese B, Hong S, Donofrio RS. *Klebsiella michiganensis* sp. nov., a new bacterium isolated from a tooth brush holder. *Curr Microbiol* **2013**; 66(1): 72-8.
3. Zheng B, Xu H, Yu X, et al. Identification and genomic characterization of a KPC-2-, NDM-1- and NDM-5-producing *Klebsiella michiganensis* isolate. *J Antimicrob Chemother* **2018**; 73(2): 536-8.
4. Hazen TH, Mettus R, McElheny CL, et al. Diversity among blaKPC-containing plasmids in *Escherichia coli* and other bacterial species isolated from the same patients. *Sci Rep* **2018**; 8(1): 10291.
5. Founou RC, Founou LL, Allam M, Ismail A, Essack SY. Genomic characterisation of *Klebsiella michiganensis* co-producing OXA-181 and NDM-1 carbapenemases isolated from a cancer patient in uMgungundlovu District, KwaZulu-Natal Province, South Africa. *S Afr Med J* **2018**; 109(1): 7-8.
6. Lowe C, Willey B, O'Shaughnessy A, et al. Outbreak of extended-spectrum beta-lactamase-producing *Klebsiella oxytoca* infections associated with contaminated handwashing sinks. *Emerg Infect Dis* **2012**; 18(8): 1242-7.
7. Mete B, Aybar Bilir Y, Aygun G, et al. *Klebsiella oxytoca* outbreak in an intensive care unit: a probable link to common insulin vial use. *Anaesth Intensive Care* **2013**; 41(2): 266-8.

8. Vergara-Lopez S, Dominguez MC, Conejo MC, Pascual A, Rodriguez-Bano J. Wastewater drainage system as an occult reservoir in a protracted clonal outbreak due to metallo-beta-lactamase-producing *Klebsiella oxytoca*. *Clin Microbiol Infect* **2013**; 19(11): E490-8.
9. Leitner E, Zarfel G, Luxner J, et al. Contaminated handwashing sinks as the source of a clonal outbreak of KPC-2-producing *Klebsiella oxytoca* on a hematology ward. *Antimicrob Agents Chemother* **2015**; 59(1): 714-6.
10. Arakawa Y, Ohta M, Kido N, et al. Chromosomal beta-lactamase of *Klebsiella oxytoca*, a new class A enzyme that hydrolyzes broad-spectrum beta-lactam antibiotics. *Antimicrobial Agents and Chemotherapy* **1989**; 33: 63-70.
11. Fevre C, Jbel M, Passet V, Weill FX, Grimont PA, Brisse S. Six groups of the OXY beta-Lactamase evolved over millions of years in *Klebsiella oxytoca*. *Antimicrob Agents Chemother* **2005**; 49(8): 3453-62.
12. Joris B, De Meester F, Galleni M, Frere JM, Van Beeumen J. The K1 beta-lactamase of *Klebsiella pneumoniae*. *Biochem J* **1987**; 243(2): 561-7.
13. Fournier B, Lagrange PH, Philippon A. beta-lactamase gene promoters of 71 clinical strains of *Klebsiella oxytoca*. *Antimicrob Agents Chemother* **1996**; 40(2): 460-3.
14. Jeong SH, Kim WM, Chang CL, et al. Neonatal intensive care unit outbreak caused by a strain of *Klebsiella oxytoca* resistant to aztreonam due to overproduction of chromosomal beta-lactamase. *J Hosp Infect* **2001**; 48(4): 281-8.
15. Zarate MS, Gales AC, Picao RC, Pujol GS, Lanza A, Smayevsky J. Outbreak of OXY-2-Producing *Klebsiella oxytoca* in a renal transplant unit. *J Clin Microbiol* **2008**; 46(6): 2099-101.
16. Then RL, Glauser MP, Angehrn P, Arisawa M. Cephalosporin resistance in strains of *Klebsiella oxytoca* isolated during antibiotic therapy. *Zentralbl Bakteriol Mikrobiol Hyg A* **1983**; 254(4): 469-79.

17. Potz NA, Colman M, Warner M, Reynolds R, Livermore DM. False-positive extended-spectrum beta-lactamase tests for *Klebsiella oxytoca* strains hyperproducing K1 beta-lactamase. *J Antimicrob Chemother* **2004**; 53(3): 545-7.
18. Bush K, Jacoby GA. Updated functional classification of beta-lactamases. *Antimicrob Agents Chemother* **2010**; 54(3): 969-76.
19. Hart CA. *Klebsiellae* and neonates. *J Hosp Infect* **1993**; 23(2): 83-6.
20. Zaidi AK, Huskins WC, Thaver D, Bhutta ZA, Abbas Z, Goldmann DA. Hospital-acquired neonatal infections in developing countries. *Lancet* **2005**; 365(9465): 1175-88.
21. European Committee on Antimicrobial Susceptibility Testing. EUCAST guidelines for detection of resistance mechanisms and specific resistances of clinical and/or epidemiological importance, version 2.0. EUCAST, **2017**.
22. Bolger AM, Lohse M, Usadel B. Trimmomatic: a flexible trimmer for Illumina sequence data. *Bioinformatics* **2014**; 30(15): 2114-20.
23. Gupta SK, Padmanabhan BR, Diene SM, et al. ARG-ANNOT, a new bioinformatic tool to discover antibiotic resistance genes in bacterial genomes. *Antimicrob Agents Chemother* **2014**; 58(1): 212-20.
24. Croucher NJ, Page AJ, Connor TR, et al. Rapid phylogenetic analysis of large samples of recombinant bacterial whole genome sequences using Gubbins. *Nucleic Acids Res* **2015**; 43(3): e15.
25. Wood DE, Salzberg SL. Kraken: ultrafast metagenomic sequence classification using exact alignments. *Genome Biol* **2014**; 15(3): R46.
26. Federhen S, Rossello-Mora R, Klenk H-P, et al. Meeting report: GenBank microbial genomic taxonomy workshop (12–13 May, 2015). *Standards in Genomic Sciences* **2016**; 11(1).

27. Petty NK, Ben Zakour NL, Stanton-Cook M, et al. Global dissemination of a multidrug resistant *Escherichia coli* clone. *Proc Natl Acad Sci U S A* **2014**; 111(15): 5694-9.
28. Forde BM, Ben Zakour NL, Stanton-Cook M, et al. The complete genome sequence of *Escherichia coli* EC958: a high quality reference sequence for the globally disseminated multidrug resistant *E. coli* O25b:H4-ST131 clone. *PLoS One* **2014**; 9(8): e104400.
29. Ronning TG, Aas CG, Stoen R, et al. Investigation of an outbreak caused by antibiotic-susceptible *Klebsiella oxytoca* in a neonatal intensive care unit in Norway. *Acta Paediatr* **2019**; 108(1): 76-82.
30. Ransjo U, Good Z, Jalakas K, et al. An outbreak of *Klebsiella oxytoca* septicemias associated with the use of invasive blood pressure monitoring equipment. *Acta Anaesthesiol Scand* **1992**; 36(3): 289-91.
31. Toldos CM, Ortiz G, Camara M, Segovia M. Application of pulsed-field gel electrophoresis in an outbreak of infection due to *Klebsiella oxytoca*. *J Med Microbiol* **1997**; 46(10): 889-90.
32. Watson JT, Jones RC, Siston AM, et al. Outbreak of catheter-associated *Klebsiella oxytoca* and *Enterobacter cloacae* bloodstream infections in an oncology chemotherapy center. *Arch Intern Med* **2005**; 165(22): 2639-43.
33. Tindall BJ, Rossello-Mora R, Busse HJ, Ludwig W, Kampf P. Notes on the characterization of prokaryote strains for taxonomic purposes. *Int J Syst Evol Microbiol* **2010**; 60(Pt 1): 249-66.
34. Liao TL, Lin AC, Chen E, et al. Complete genome sequence of *Klebsiella oxytoca* E718, a New Delhi metallo-beta-lactamase-1-producing nosocomial strain. *J Bacteriol* **2012**; 194(19): 5454.
35. Reiss I, Borkhardt A, Füssle R, Sziegoleit A, Gortner L. Disinfectant contaminated with *Klebsiella oxytoca* as a source of sepsis in babies. *The Lancet* **2000**; 356(9226): 310.

36. Paczosa MK, Meccas J. *Klebsiella pneumoniae*: Going on the Offense with a Strong Defense. *Microbiol Mol Biol Rev* **2016**; 80(3): 629-61.
37. Schmithausen RM, Exner M, Rösing C, et al. The washing machine as a reservoir for transmission of ESBL-producing *Klebsiella oxytoca* in newborns. *bioRxiv* **2018**.
38. Shukor MY, Husin WS, Rahman MF, Shamaan NA, Syed MA. Isolation and characterization of an SDS-degrading *Klebsiella oxytoca*. *J Environ Biol* **2009**; 30(1): 129-34.

**Table 1:** Sample details

| <b>ID</b>     | <b>CASE</b> | <b>SOURCE</b> | <b>GENDER</b> | <b>DATE SAMPLE</b> | <b>SAMPLE</b> | <b>ORGANISM</b>                 | <b>HOSPITAL</b>   |
|---------------|-------------|---------------|---------------|--------------------|---------------|---------------------------------|-------------------|
| <b>M8431</b>  | 1           | Neonatal      | Male          | September-2017     | Rectal swab   | <i>Klebsiella michiganensis</i> | PRIMARY HOSPITAL  |
| <b>M8432</b>  | 2           | Neonatal      | Female        | October-2017       | Rectal swab   | <i>Klebsiella michiganensis</i> | PRIMARY HOSPITAL  |
| <b>M8440</b>  | 3           | Neonatal      | Male          | December-2017      | Skin swab     | <i>Klebsiella michiganensis</i> | EXTERNAL HOSPITAL |
| <b>M8842</b>  | 3           | Neonatal      | Male          | December-2017      | Rectal swab   | <i>Escherichia coli</i>         | EXTERNAL HOSPITAL |
| <b>M8433</b>  | 4           | Neonatal      | Female        | January-2018       | Rectal swab   | <i>Klebsiella michiganensis</i> | PRIMARY HOSPITAL  |
| <b>M8434</b>  | 5           | Neonatal      | Female        | January-2018       | Rectal swab   | <i>Klebsiella michiganensis</i> | PRIMARY HOSPITAL  |
| <b>M8630</b>  | 6           | Neonatal      | Female        | January-2018       | Rectal swab   | <i>Klebsiella michiganensis</i> | PRIMARY HOSPITAL  |
| <b>M8631</b>  | 7           | Neonatal      | Female        | January-2018       | Rectal swab   | <i>Escherichia coli</i>         | PRIMARY HOSPITAL  |
| <b>M8843</b>  | 8           | Maternal      | Female        | January-2018       | Rectal swab   | <i>Klebsiella oxytoca</i>       | PRIMARY HOSPITAL  |
| <b>M8845</b>  | 7           | Neonatal      | Female        | January-2018       | Rectal swab   | <i>Escherichia coli</i>         | PRIMARY HOSPITAL  |
| <b>M8847</b>  | 9           | Neonatal      | Male          | January-2018       | Other         | <i>Escherichia coli</i>         | PRIMARY HOSPITAL  |
| <b>M8844</b>  | 10          | Neonatal      | Female        | January-2018       | Rectal swab   | <i>Escherichia coli</i>         | PRIMARY HOSPITAL  |
| <b>M81092</b> | 11          | Neonatal      | Female        | January-2018       | Rectal swab   | <i>Klebsiella michiganensis</i> | PRIMARY HOSPITAL  |
| <b>M81378</b> | 12          | Neonatal      | Male          | February-2018      | Rectal swab   | <i>Klebsiella michiganensis</i> | PRIMARY HOSPITAL  |
| <b>M82255</b> | 13          | Neonatal      | Female        | February-2018      | Rectal swab   | <i>Klebsiella</i>               | PRIMARY HOSPITAL  |

|               |    |               |        |              |                             |                                 |                  |
|---------------|----|---------------|--------|--------------|-----------------------------|---------------------------------|------------------|
|               |    |               |        |              |                             | <i>michiganensis</i>            |                  |
| <b>M82629</b> | 14 | Neonatal      | Female | March-2018   | Rectal swab                 | <i>Klebsiella michiganensis</i> | PRIMARY HOSPITAL |
| <b>M8849</b>  | -  | Environmental | -      | January-2018 | Baby bath drain             | <i>Escherichia coli</i>         | PRIMARY HOSPITAL |
| <b>M8848</b>  | -  | Environmental | -      | January-2018 | Baby bath drain             | <i>Klebsiella michiganensis</i> | PRIMARY HOSPITAL |
| <b>M81090</b> | -  | Environmental | -      | January-2018 | Baby Bath                   | <i>Klebsiella michiganensis</i> | PRIMARY HOSPITAL |
| <b>M81091</b> | -  | Environmental | -      | January-2018 | Detergent (Flower service)  | <i>Klebsiella michiganensis</i> | PRIMARY HOSPITAL |
| <b>M82256</b> | -  | Environmental | -      | March-2018   | Detergent (Milk Room)       | <i>Klebsiella michiganensis</i> | PRIMARY HOSPITAL |
| <b>M82257</b> | -  | Environmental | -      | March-2018   | Detergent (Nurses Station)  | <i>Klebsiella michiganensis</i> | PRIMARY HOSPITAL |
| <b>M82624</b> | -  | Environmental | -      | March-2018   | ICU Detergent Brush         | <i>Klebsiella michiganensis</i> | PRIMARY HOSPITAL |
| <b>M82625</b> | -  | Environmental | -      | March-2018   | Detergent (Pan Room)        | <i>Klebsiella michiganensis</i> | PRIMARY HOSPITAL |
| <b>M82626</b> | -  | Environmental | -      | March-2018   | Milk Room                   | <i>Klebsiella michiganensis</i> | PRIMARY HOSPITAL |
| <b>M82627</b> | -  | Environmental | -      | March-2018   | Detergent (ICU)             | <i>Klebsiella michiganensis</i> | PRIMARY HOSPITAL |
| <b>M82628</b> | -  | Environmental | -      | March-2018   | Detergent (Paediatric ward) | <i>Klebsiella michiganensis</i> | PRIMARY HOSPITAL |



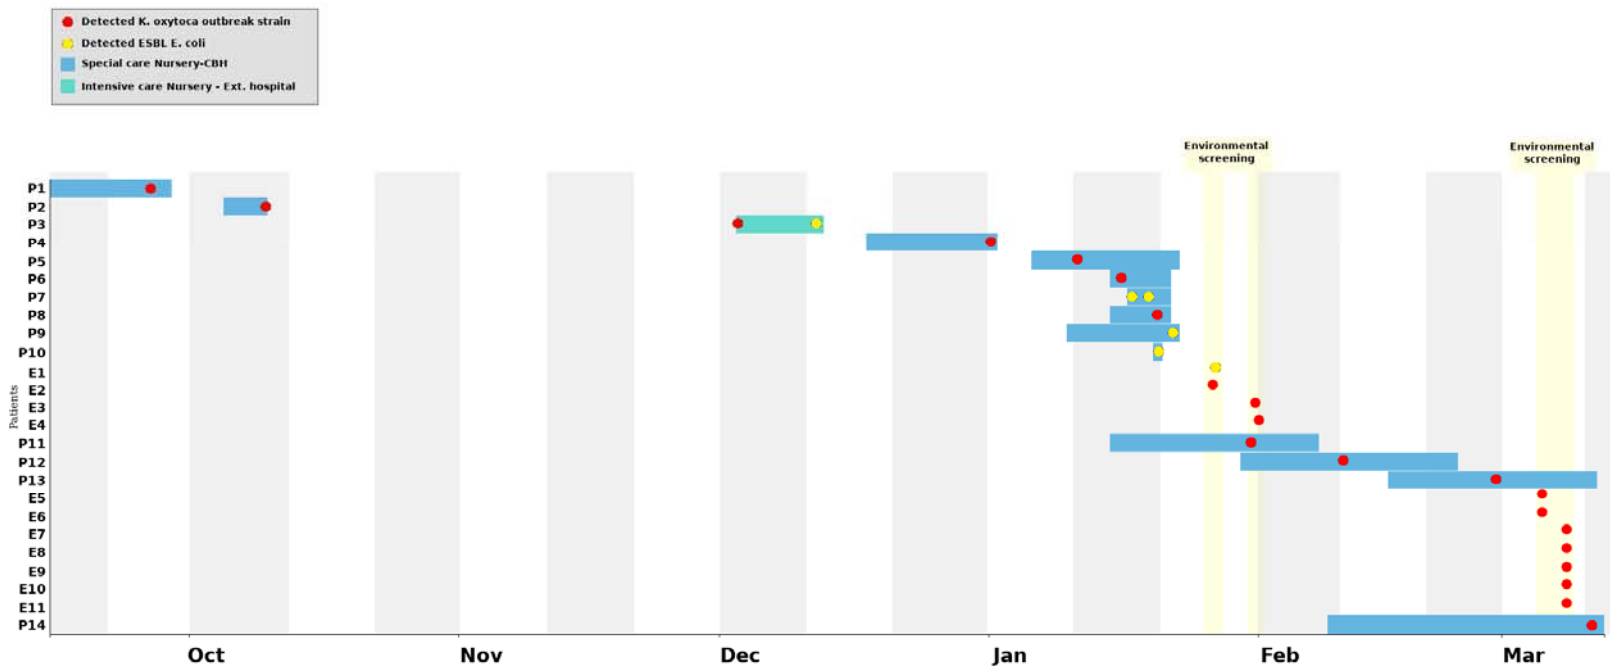

**Figure 1:** *K. michiganensis* outbreak; timeline of events. Alternating white and grey columns indicate periods of approximately 10 days

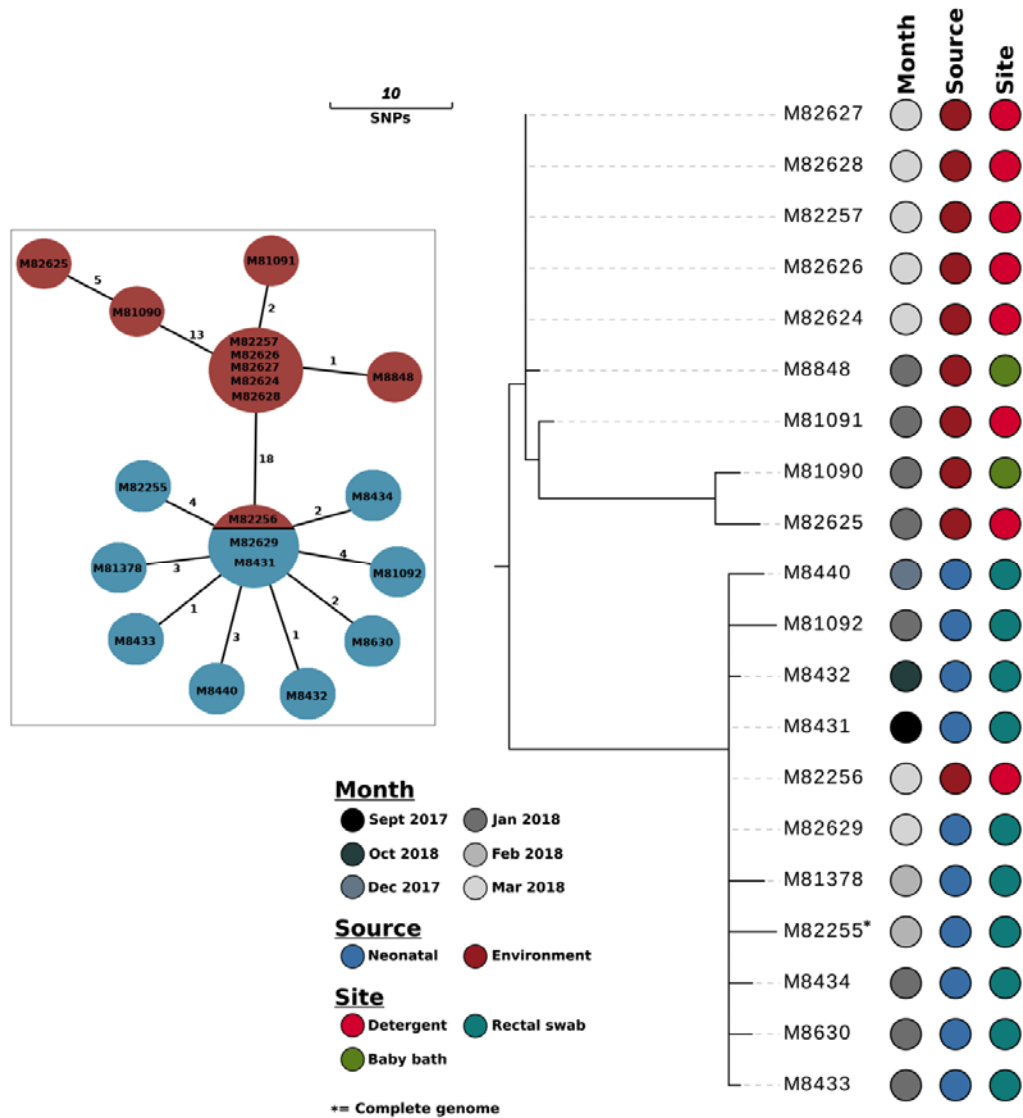

**Figure 2: The evolutionary relationship of *K. michiganensis* strains.** Maximum likelihood phylogenetic tree built using 38 core genome SNPs relative to *K. michiganensis* strain M82255. The month of isolation, source (neonatal or environmental) and specific site of isolation are indicate as per the legend. Branches (black lines) represent the genetic distance between isolates in terms of SNPs. The scale is indicated. **Insert:** Minimal Spanning tree showing relationships between environmental (red) and patient (blue) samples. Numbers attached to branches represent number of SNPs between genomes. Isolate codes are represented within each node (if >1 code listed, then these were identical at the core genome level
